# Supplementary material
Source: publisher figshare collection journal article supplement (https://acs.figshare.com/ndownloader/files/22111485)
Supplement: Supplementary file 1 [file 22111485]

## Electronic Supplementary information

### Tactical surface modification of 3D graphite felt as electrode of vanadium redox flow batteries with enhanced electrolyte utilization and fast reaction kinetic

*Rajeev K. Gautam, Manshu Kapoor and Anil Verma\**

Sustainable Environenergy Research Lab (SERL), Department of Chemical Engineering,  
Indian Institute of Technology Delhi, Hauz-Khas, New Delhi-110016, India

[\*] Corresponding Author: [anilverma@iitd.ac.in](mailto:anilverma@iitd.ac.in)

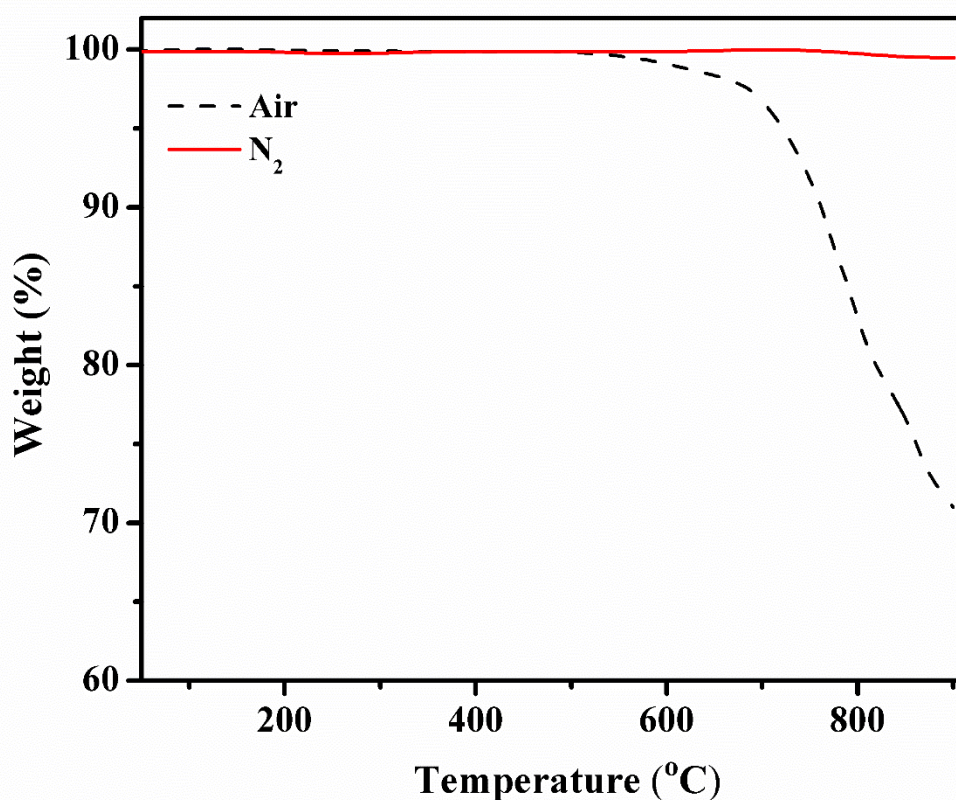

**Figure S1:** TGA analysis of GF

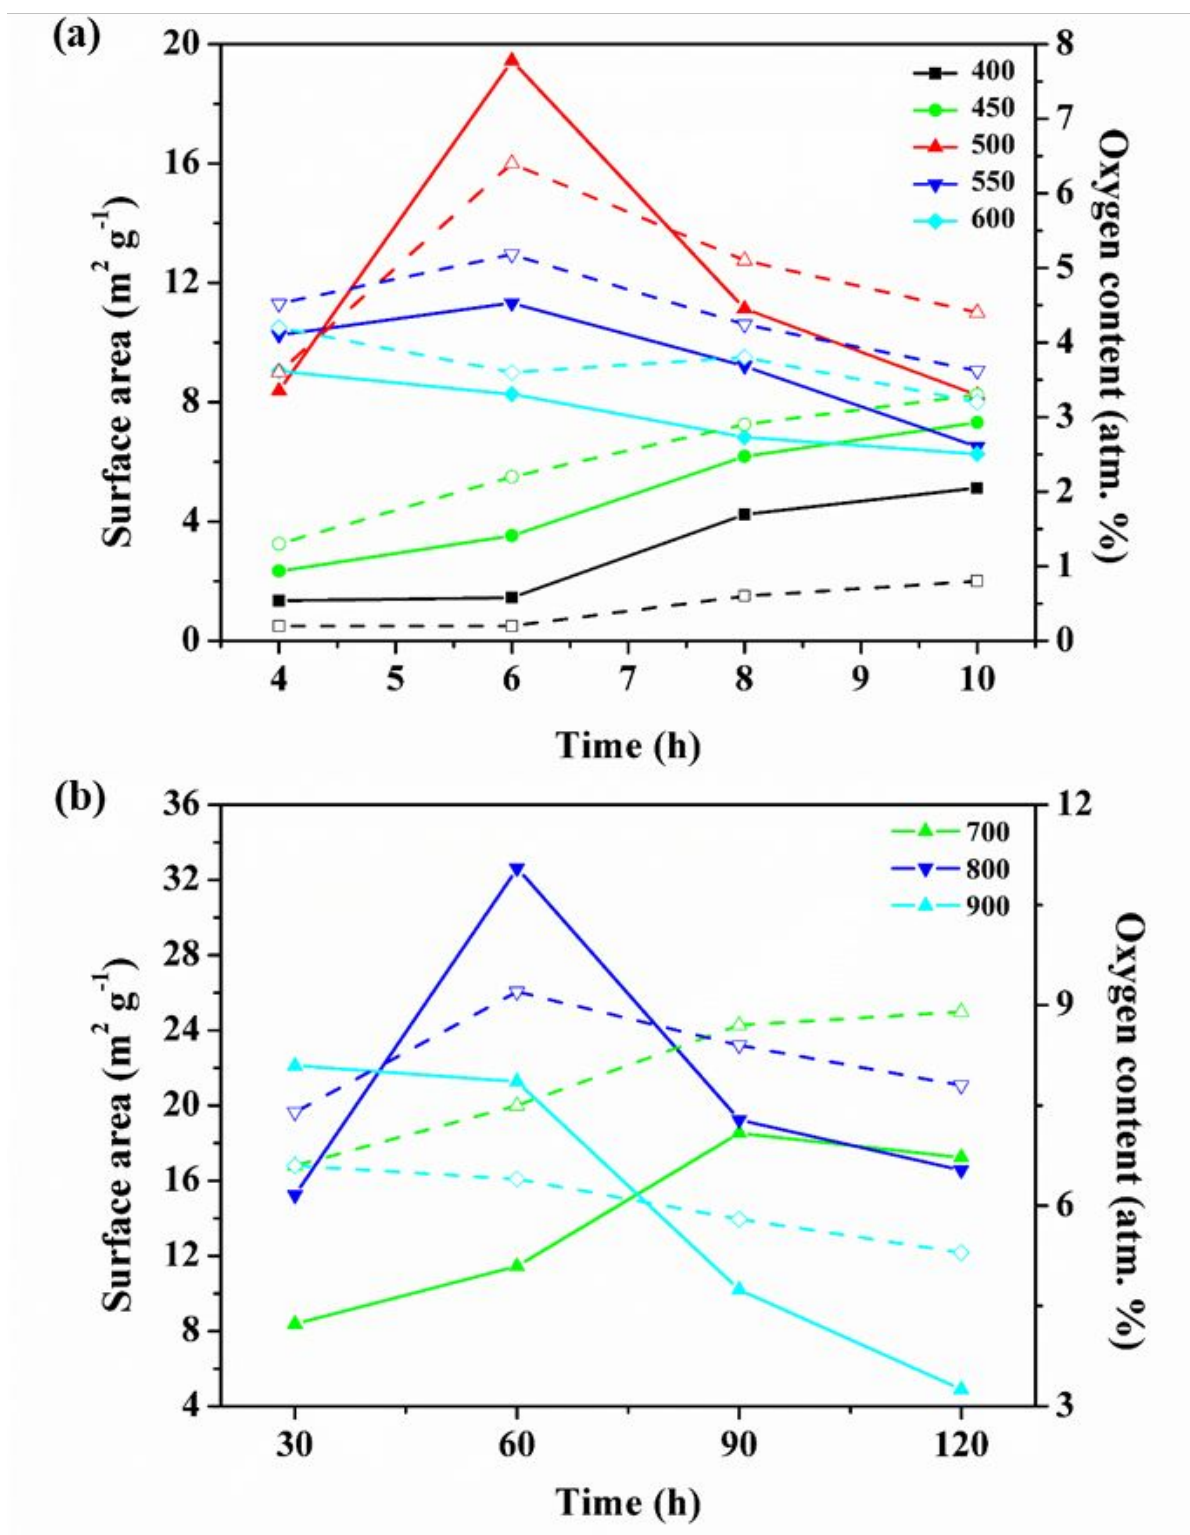

**Figure S2:** Variation in BET surface area (solid line) and oxygen content (dotted line) with variation in time and temperature of (a) thermally oxidized GF and (b) KOH treated TGF

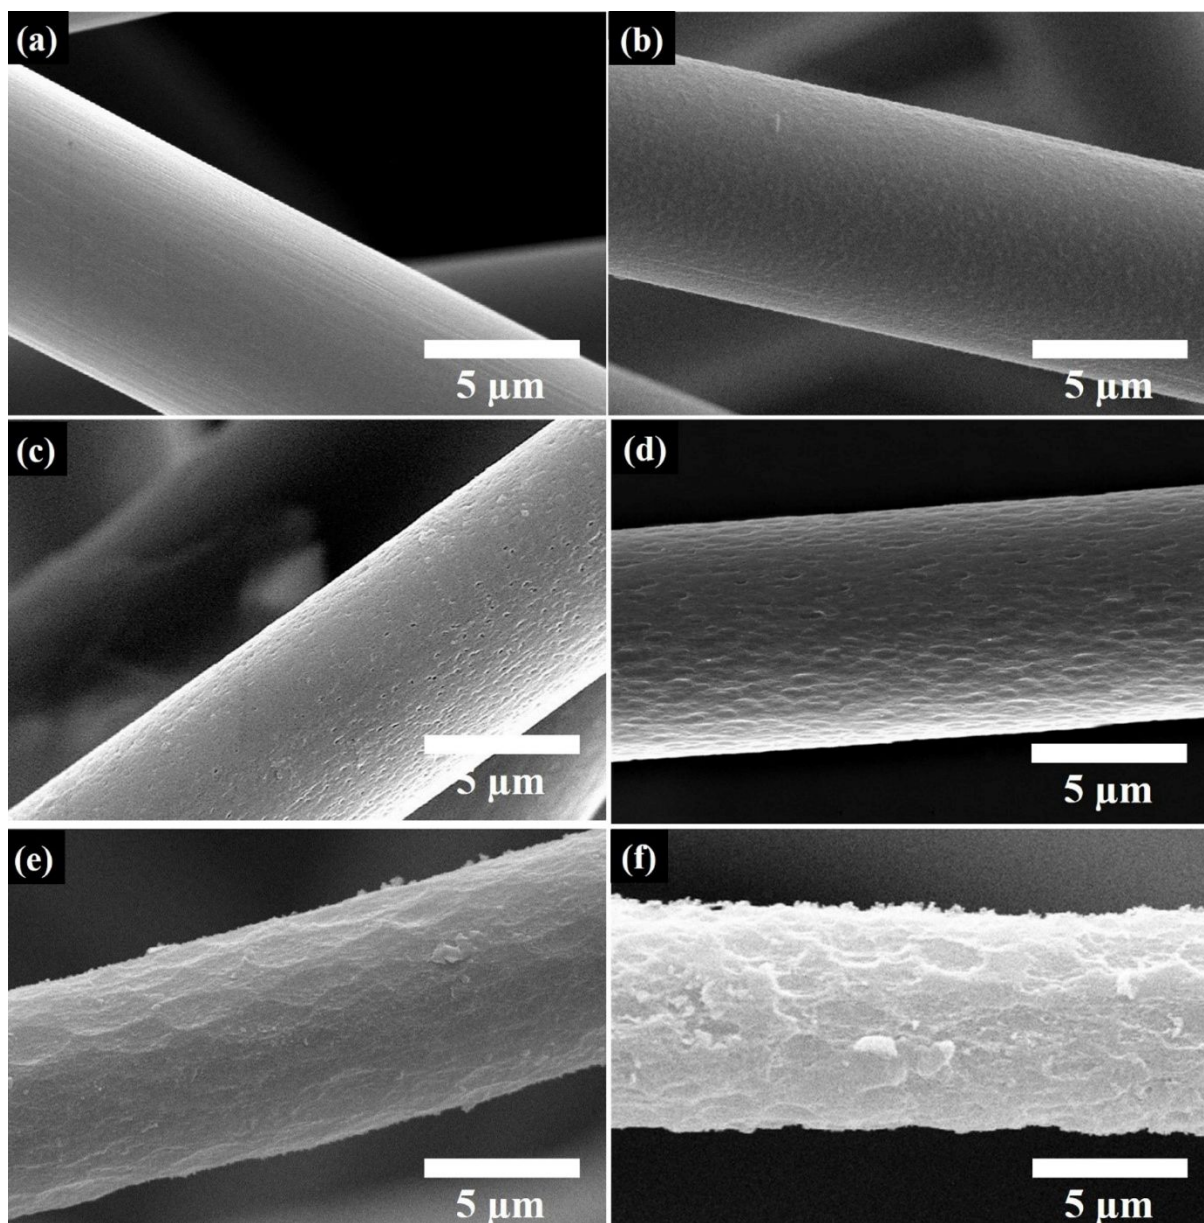

**Figure S3:** Surface morphology of (a) GF; GF treated for 6h at (b) 400 °C; (c) 450 °C; (d) 500 °C; (e) 550 °C; and (f) 600 °C



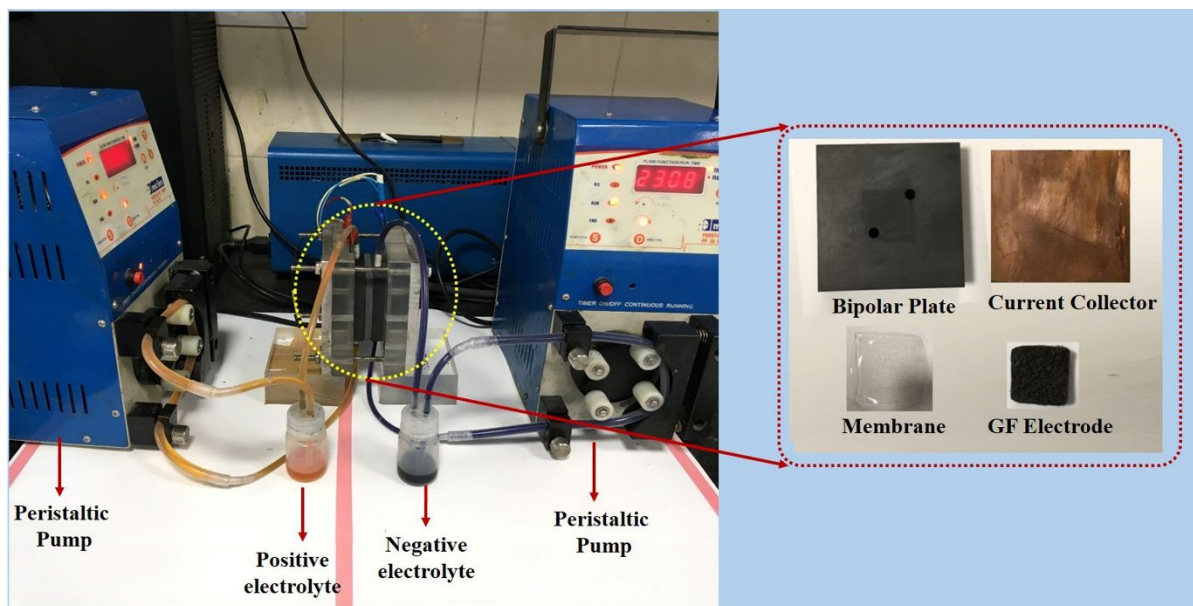

**Figure S4:** Digital photograph of VRFB system and its components

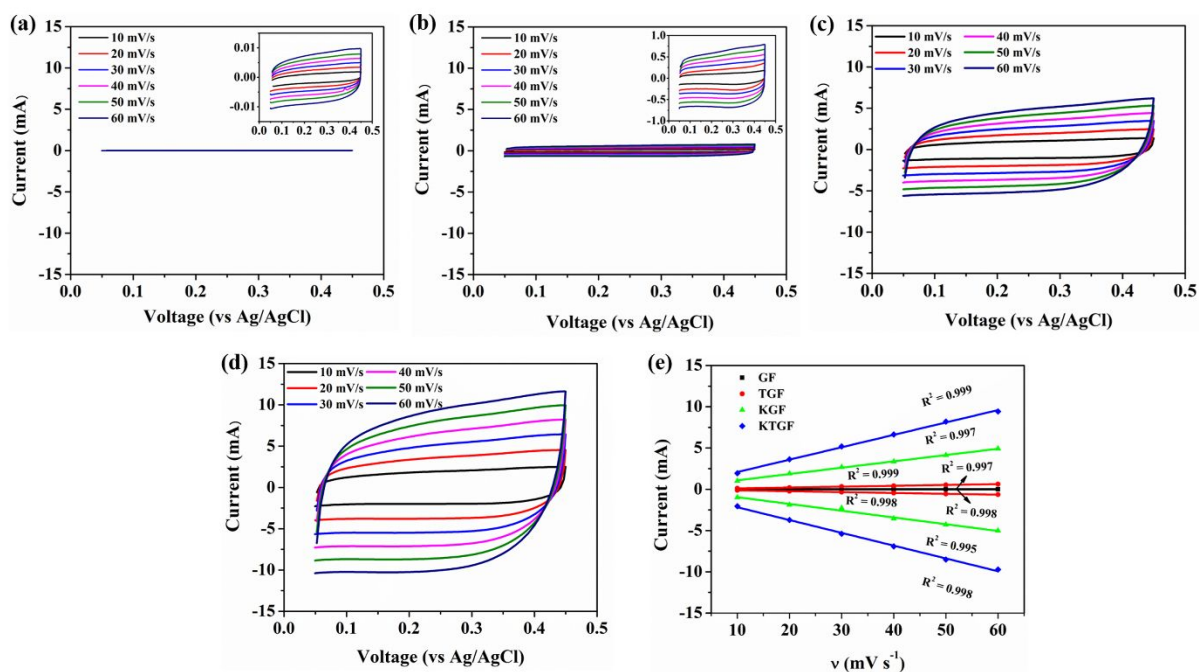

**Figure S5:** Cyclic voltammetry curves for determining electrochemically-active surface area of (a) GF, (b) TGF, (c) KGF, and (d) KTGF in non-Faradaic region potential range between 0.05 and 0.45 V in 1 M  $\text{H}_2\text{SO}_4$ ; (e) linear fitting of anodic and cathodic charging current (measured at 0.25 V) vs scan rate for GF, TGF, KGF, and KTGF.

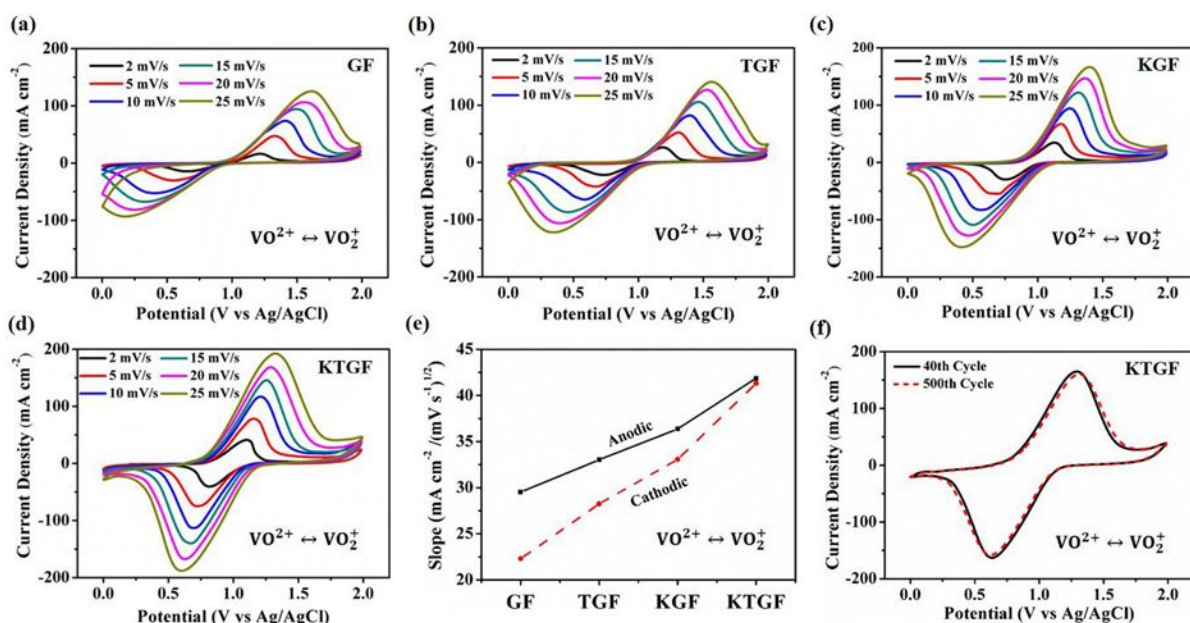

**Figure S6:** CV curves of (a) GF, (b) TGF, (c) KGF, (d) KTGF at a different scan rate in 0.1 M  $\text{VO}^{2+} + 2.5 \text{ M H}_2\text{SO}_4$  solution, (d) slope value of the curves of peak current density vs. square root of scan rate of GF, TGF, KGF, and KTGF; and (e) CV curves of KTGF before and after 500 cycles at 20 mV s<sup>-1</sup> in 0.1 M  $\text{VO}^{2+} + 2.5 \text{ M H}_2\text{SO}_4$  solution

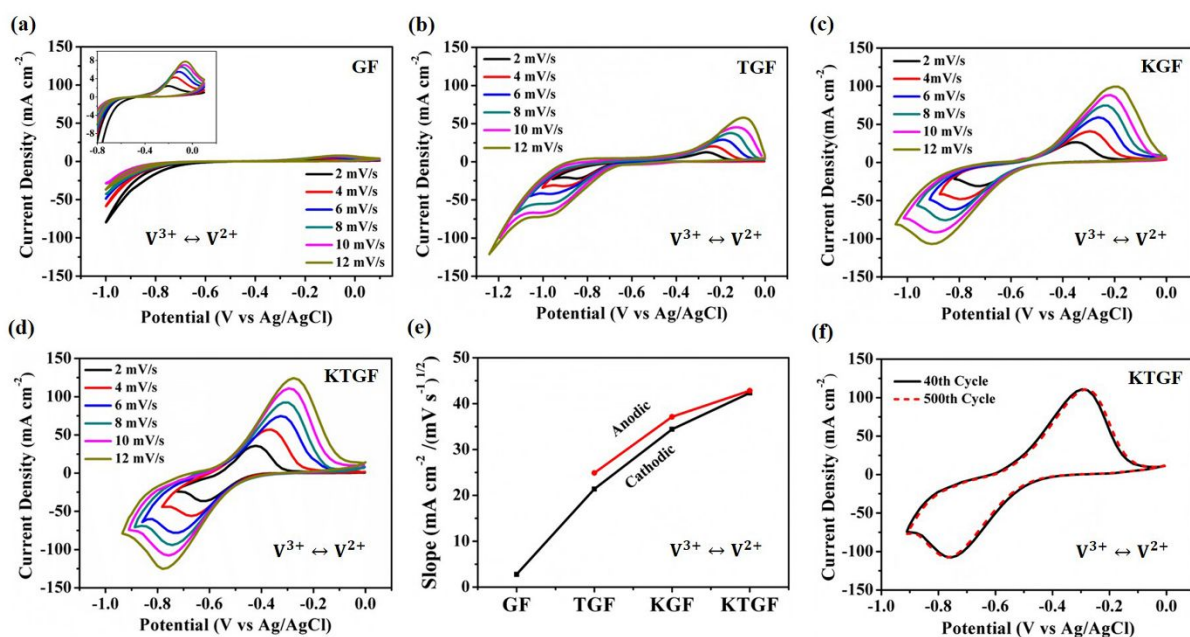

**Figure S7:** CV curves of (a) GF, (b) TGF, (c) KGF, (d) KTGF at a different scan rate in 0.1 M V<sup>3+</sup> + 2.5 M H<sub>2</sub>SO<sub>4</sub> solution, (d) slope value of the curves of peak current density vs. square root of scan rate of GF, TGF, KGF, and KTGF; and (e) CV curves of KTGF before and after 500 cycles at 10 mV s<sup>-1</sup> in 0.1 M V<sup>3+</sup> + 2.5 M H<sub>2</sub>SO<sub>4</sub> solution
